# Supplementary material
Source: ML conference proceedings conference paper supplement (https://openreview.net/forum?id=8zxGruuzr9)
Supplement: supplementary_material [file attachment]

*For the Demographic prompt:*

**List of Hobbies** (based on The Activity Card Sort (ACS-UK; Laver-Fawcett et al., 2016)):

- Shopping

- Driving

- Taking care of pets

- Managing financial matters

- Taking a rest

- Going to the hairdresser / barber

- Childcare / babysitting

- Preparing a hot drink

- Conducting personal care

- Conducting personal business

- Taking care of others

- Cleaning/ fixing things

- Talking on the telephone

- Creative writing / keeping a journal

- Knitting / needlecrafts

- Playing table games

- Going to watch a sports event

- Cooking / baking as a hobby

- Doing puzzles / crosswords

- Using a computer

- Taking photographs

- Reading a religious book

- Written communications

- Looking at photo albums / home videos

- Researching family / local history

- Reading a newspaper / magazine

- Watching nature

- Playing bingo

- Watching television

- Listening to the radio / music

- Relaxing / meditating

- Entering competitions

- Reading a book

- Flower arranging

- Going to the beach

- Dancing

- Swimming

- Playing a ball game

- Walking

- Hiking / rambling

- Exercising

- Riding a bicycle

- Going on holiday / travelling

- Attending a leisure / social group

- Going to gardens / parks

- Fishing

- Having a picnic / BBQ

- Spending time with family / friends

- Eating out

- Going to parties

- Going for drinks at pubs / social clubs

- Volunteer work

- Cultural visits

- Going to music / performing arts events

- Going to church / mosque / synagogue / temple / other

- Collecting (stamps, posters, figures)

- Drawing / painting

- Interior decorating

*For the Demographic prompt:*

**List of Occupation** (based on the World Values Survey (WVS-7; Haerpfer et al., 2022))

- Professional and technical expertise

- Higher administrative roles

- Clerical work

- Sales

- Service

- Skilled work

- Semi-skilled work

- Unskilled work

- Farm work

- Farm management or ownership

- No prior job experience

*For the Names prompt:*

**List of Titles and Names** (based on Aher et al., 2023):

American Indian group:

- Ms. Haskie

- Ms. Secatero

- Mr. Goseyun

- Ms. Manuelito

- Ms. Delgarito

- Ms. Roanhorse

- Mx. Chasinghawk

- Mx. Notah

- Mr. Gishie

- Mx. Secody

- Mx. Bitsuie

- Mr. Goldtooth

- Ms. Henio

- Mx. Yellowhair

- Mx. Chinana

- Ms. Kanuho

- Mr. Clah

- Mx. Smallcanyon

- Ms. Peshlakai

- Mx. Tabaha

- Mx. Clitso

- Ms. Begaye

- Mx. Altaha

- Mr. Littlelight

- Mr. Tsinnijinnie

- Mr. Cayaditto

- Mx. Apachito

- Mx. Todacheenie

- Mr. Wauneka

- Mr. Begay

- Ms. Keams

- Mr. Etsitty

- Mx. Laughing

- Mx. Cosay

- Ms. Ganadonegro

- Ms. Hosteen

- Mr. Todacheene

- Ms. Twobulls

- Ms. Yazzie

- Ms. Blackgoat

- Ms. Tapaha

- Mr. Whiteplume

- Mr. Nez

- Mr. Whitehat

- Mx. Tsinnie

- Mr. Shije

- Ms. Becenti

- Mx. Blueeyes

- Mx. Tsosie

- Mr. Atcitty

- Mx. Manygoats

- Mr. Altaha

- Mx. Goseyun

- Mx. Begay

- Mr. Henio

- Mx. Whiteplume

- Ms. Goseyun

- Mr. Begaye

- Mr. Bitsuie

- Ms. Laughing

Asian pacific group:

- Mr. Ha

- Mr. Hu

- Mr. Lin

- Mr. Kim

- Mx. Chau

- Mr. Ngo

- Mr. Tran

- Mx. Zhou

- Ms. Oh

- Ms. Le

- Ms. Moua

- Mr. Shen

- Mx. Wang

- Ms. Chung

- Mx. Chu

- Ms. Cheung

- Mx. Li

- Mx. Ng

- Mr. Kang

- Mx. Ko

- Ms. Gupta

- Mx. Thai

- Mr. Jiang

- Mx. Chen

- Mr. Luu

- Mr. Cheng

- Mr. Yan

- Mr. Lai

- Ms. Sun

- Mx. Ho

- Ms. Lo

- Ms. Duong

- Ms. Song

- Mx. Thao

- Ms. Yang

- Mr. Shin

- Mx. Jain

- Ms. Yu

- Mx. Chiu

- Mx. Sharma

- Mr. Xiong

- Mr. Huang

- Mx. Pham

- Ms. Yoon

- Ms. Choi

- Ms. Liu

- Mx. Zhang

- Mx. Vu

- Ms. Zhao

- Mr. Tam

- Ms. Nguyen

- Mx. Trinh

- Mr. Nguyen

- Mr. Moua

- Mr. Yoon

- Ms. Chiu

- Mx. Lin

- Mx. Moua

- Mx. Shin

- Mx. Luu

Black group:

- Mx. Cisse

- Ms. Jeanpierre

- Ms. Wigfall

- Mr. Calixte

- Mr. Conteh

- Mr. Jeanbaptiste

- Mr. Mondesir

- Ms. Mwangi

- Mr. Jeanjacques

- Ms. Jama

- Mx. Straughter

- Ms. Smalls

- Mx. Fofana

- Mr. Koroma

- Mx. Abdullahi

- Ms. Kebede

- Ms. Prioleau

- Mr. Manigault

- Mr. Mekonnen

- Mr. Gadson

- Ms. Diop

- Ms. Grandberry

- Mr. Njoroge

- Mr. Jalloh

- Ms. Sesay

- Mx. Jeanfrancois

- Mx. Jeancharles

- Ms. Jeanlouis

- Ms. Louissaint

- Mx. Traore

- Mr. Osei

- Mr. Bekele

- Ms. Bekele

- Mr. Straughter

- Mr. Grandberry

- Mr. Jeanlouis

- Mx. Mekonnen

- Mx. Conteh

- Mx. Bekele

- Ms. Gadson

- Mx. Smalls

- Mr. Louissaint

- Mx. Njoroge

- Mr. Kebede

- Mr. Prioleau

- Mx. Mwangi

- Ms. Cisse

- Mx. Diop

- Ms. Calixte

- Mr. Jama

- Ms. Straughter

- Ms. Osei

- Mx. Jeanjacques

- Mr. Mwangi

- Mr. Jeanfrancois

- Mx. Sesay

- Ms. Abdullahi

- Mx. Grandberry

- Mx. Osei

- Mr. Smalls

Hispanic group:

- Ms. Rios

- Mx. Gomez

- Mx. Delgado

- Ms. Lopez

- Ms. Avila

- Mr. Herrera

- Mx. Salazar

- Mr. Morales

- Mr. Guerrero

- Ms. Munoz

- Mr. Rojas

- Mr. Carrillo

- Mx. Aguilar

- Mx. Moreno

- Mr. Chavez

- Mx. Diaz

- Mx. Jimenez

- Mr. Fuentes

- Ms. Espinoza

- Mx. Perez

- Ms. Nunez

- Mx. Rivas

- Mr. Alvarez

- Ms. Garcia

- Mr. Molina

- Mr. Vasquez

- Ms. Medina

- Ms. Salinas

- Mr. Pena

- Mx. Ortega

- Mx. Rivera

- Ms. Torres

- Ms. Rodriguez

- Ms. Castillo

- Ms. Mejia

- Mx. Vargas

- Ms. Gonzalez

- Ms. Vega

- Mr. Vazquez

- Ms. Calderon

- Mr. Ramirez

- Mr. Ruiz

- Mx. Padilla

- Ms. Flores

- Mr. Aguirre

- Mx. Contreras

- Ms. Soto

- Mr. Sanchez

- Ms. Marquez

- Mr. Serrano

- Mx. Marquez

- Ms. Traore

- Mr. Munoz

- Mr. Contreras

- Mr. Lopez

- Mr. Torres

- Mr. Rivas

- Ms. Fuentes

- Mx. Molina

- Ms. Aguirre

White group:

- Mr. Duffy

- Mx. Olsen

- Mr. Hoffman

- Mr. Oneill

- Mr. Brennan

- Mx. Foley

- Mr. Mccarthy

- Ms. Bauer

- Ms. Parsons

- Mx. Russo

- Ms. Peck

- Mx. Snyder

- Ms. Carlson

- Mr. Rasmussen

- Ms. Berg

- Mx. Meyer

- Mx. Donovan

- Mr. Hoover

- Ms. Schultz

- Ms. Hensley

- Ms. Krueger

- Ms. Friedman

- Mx. Brandt

- Mr. Boyle

- Mx. Reilly

- Ms. Moyer

- Ms. Johnston

- Ms. Conrad

- Mx. Christensen

- Mr. Stark

- Ms. Koch

- Mx. Kline

- Ms. Weiss

- Ms. Owen

- Mx. Weber

- Mr. Schaefer

- Mx. Mcmahon

- Mr. Roth

- Mr. Hartman

- Mx. Schmidt

- Mx. Flynn

- Mr. Case

- Mx. McMahon

- Ms. Mayer

- Ms. Hebert

- Mr. Kramer

- Ms. Huber

- Mx. Larson

- Mr. Nielsen

- Ms. Gallagher

- Mr. Howe

- Mr. Macdonald

- Mr. Morse

- Mr. Schneider

- Mr. Snyder

- Mr. Friedman

- Mx. Berg

- Ms. Hoover

- Mx. Case

- Ms. Schaefer
