# Supplementary material
Source: ML conference proceedings conference paper supplement (https://openreview.net/forum?id=8zxGruuzr9)
Supplement: supplementary_material [file gemma_9_all_coordinates.xlsx]

## Sheet: All datasets
ValueAnchor00					ValueAnchor07
	D1	D2				D1	D2
SDT	0.70208	-0.0413388			SDT	0.707857	-0.0305167
SDA	0.675207	0.296313			SDA	0.672819	0.298314
ST	0.564002	0.493028			ST	0.563898	0.490199
HE	0.470697	0.599491			HE	0.455623	0.608029
AC	0.13012	0.746239			AC	0.127313	0.740756
POD	-0.223268	0.697081			POD	-0.200287	0.705788
POR	-0.0665265	0.746684			POR	-0.0455797	0.749759
FAC	-0.418129	0.579651			FAC	-0.395816	0.577936
SEP	-0.645295	0.0747481			SEP	-0.647364	0.0741944
SES	-0.654307	0.208013			SES	-0.650697	0.18144
TR	-0.660647	-0.0809677			TR	-0.642503	-0.0894468
COR	-0.49754	-0.385881			COR	-0.507701	-0.36113
COI	-0.356497	-0.520535			COI	-0.365189	-0.528852
HUM	-0.179927	-0.621097			HUM	-0.207528	-0.635032
UNN	0.434278	-0.511423			UNN	0.450675	-0.498546
UNC	0.262582	-0.602391			UNC	0.278745	-0.602207
UNT	0.473093	-0.474427			UNT	0.472175	-0.497984
BEC	0.0505984	-0.633927			BEC	0.0629523	-0.629616
BED	-0.0605217	-0.56926			BED	-0.129393	-0.553084
demographic00					demographic07
	D1	D2				D1	D2
SDT	0.698121	-0.216263			SDT	0.698631	-0.215586
SDA	0.683705	0.00555485			SDA	0.628417	-0.0315847
ST	0.641121	0.383417			ST	0.665493	0.366474
HE	0.369913	0.562805			HE	0.370393	0.583397
AC	0.117609	0.621375			AC	0.153188	0.606619
POD	-0.439055	0.560119			POD	-0.458177	0.537651
POR	-0.241402	0.664897			POR	-0.244849	0.678266
FAC	-0.338339	0.59791			FAC	-0.265618	0.622745
SEP	-0.548962	0.26113			SEP	-0.551468	0.270446
SES	-0.587047	0.250506			SES	-0.609597	0.238807
TR	-0.679432	0.0979303			TR	-0.704769	0.0398691
COR	-0.191763	-0.216106			COR	-0.313162	-0.31684
COI	-0.64506	-0.221061			COI	-0.66594	-0.168037
HUM	-0.444419	-0.56012			HUM	-0.435711	-0.618618
UNN	0.608349	-0.537174			UNN	0.526346	-0.637568
UNC	0.531207	-0.576484			UNC	0.58178	-0.557565
UNT	0.597408	-0.460696			UNT	0.64832	-0.431261
BEC	-0.00835239	-0.624496			BEC	-0.0212788	-0.540766
BED	-0.123603	-0.593243			BED	-0.00199758	-0.42645
persona00					persona07
	D1	D2				D1	D2
SDT	0.253888	0.092766			SDT	0.19102	-0.00604158
SDA	-0.61557	-0.229956			SDA	-0.588467	-0.126295
ST	0.52018	0.638598			ST	0.568163	0.544582
HE	0.454763	0.673306			HE	0.519542	0.544407
AC	0.225452	0.649211			AC	0.347858	0.588478
POD	-0.553229	0.379508			POD	-0.353207	0.591957
POR	-0.126322	0.634262			POR	-0.124235	0.674806
FAC	-0.0577519	0.647192			FAC	-0.0837318	0.662088
SEP	-0.0687078	0.256519			SEP	-0.225202	0.198625
SES	-0.552823	0.152886			SES	-0.644967	0.190022
TR	-0.459075	0.332543			TR	-0.58681	0.342147
COR	-0.327459	-0.672662			COR	-0.485787	-0.485633
COI	-0.465869	-0.496577			COI	-0.244859	-0.293129
HUM	-0.074431	-0.786052			HUM	-0.153978	-0.84408
UNN	0.142214	-0.838704			UNN	0.0484603	-0.876303
UNC	0.355064	-0.737581			UNC	0.257671	-0.801736
UNT	0.327721	-0.788589			UNT	0.436967	-0.691124
BEC	0.452746	-0.219329			BEC	0.483638	-0.310849
BED	0.56921	0.312659			BED	0.637925	0.0980785
names00					names07
	D1	D2				D1	D2
SDT	0.206282	0.179582			SDT	0.455851	0.0373334
SDA	0.141006	0.351618			SDA	0.319296	0.151949
ST	0.74942	0.123167			ST	0.761424	0.236916
HE	0.764441	0.273432			HE	0.623006	0.481496
AC	0.0590593	0.746595			AC	0.0259681	0.726619
POD	-0.296899	0.700118			POD	-0.378039	0.698738
POR	-0.134804	0.771902			POR	-0.229419	0.730979
FAC	-0.129733	0.700655			FAC	-0.169056	0.706695
SEP	-0.458319	0.293916			SEP	-0.423338	0.224211
SES	-0.606693	0.261784			SES	-0.584935	0.261542
TR	-0.705965	-0.448839			TR	-0.787433	-0.211694
COR	-0.391964	-0.237675			COR	-0.420822	-0.243279
COI	-0.421872	-0.12381			COI	-0.544455	-0.339932
HUM	-0.122971	-0.836951			HUM	-0.0925504	-0.777355
UNN	0.448055	-0.811272			UNN	0.422168	-0.808699
UNC	0.275833	-0.829842			UNC	0.252706	-0.792896
UNT	0.359183	-0.792903			UNT	0.329331	-0.764459
BEC	0.246912	-0.215814			BEC	0.304056	-0.204796
BED	0.019029	-0.105663			BED	0.136242	-0.113368
