# Supplementary material
Source: ML conference proceedings conference paper supplement (https://openreview.net/forum?id=8zxGruuzr9)
Supplement: supplementary_material [file gemma_27_all_coordinates.xlsx]

## Sheet: All datasets
ValueAnchor00					ValueAnchor07
	D1	D2				D1	D2
SDT	0.708345	0.0351838			SDT	0.722644	0.0400685
SDA	0.712829	0.126239			SDA	0.722714	0.176494
ST	0.607011	0.423644			ST	0.639372	0.390284
HE	0.647404	0.356654			HE	0.621446	0.394514
AC	0.237546	0.726028			AC	0.198693	0.732905
POD	-0.160835	0.752262			POD	-0.138857	0.744054
POR	0.0552103	0.754114			POR	0.0413571	0.767308
FAC	-0.496993	0.536922			FAC	-0.465895	0.550777
SEP	-0.598833	-0.31592			SEP	-0.553108	-0.328327
SES	-0.681923	0.197103			SES	-0.663215	0.196021
TR	-0.691341	-0.0571193			TR	-0.672415	-0.120994
COR	-0.599584	-0.248733			COR	-0.607902	-0.25225
COI	-0.336094	-0.54494			COI	-0.338824	-0.539555
HUM	-0.118329	-0.615639			HUM	-0.12987	-0.598715
UNN	0.411156	-0.54252			UNN	0.404632	-0.521947
UNC	0.204404	-0.634712			UNC	0.213915	-0.62633
UNT	0.455409	-0.465085			UNT	0.471311	-0.456075
BEC	0.154411	-0.512739			BEC	0.0932144	-0.567143
BED	-0.509792	0.0292569			BED	-0.559213	0.0189106
					demographic07
						D1	D2
					SDT	0.742959	-0.133522
					SDA	0.675941	-0.0233176
					ST	0.779691	0.135911
					HE	0.564507	0.497627
					AC	0.26284	0.55836
					POD	-0.423939	0.572993
					POR	0.011068	0.659591
					FAC	-0.59726	0.451712
					SEP	-0.70354	-0.111797
					SES	-0.677701	0.248998
					TR	-0.767348	0.119353
					COR	-0.456223	-0.13812
					COI	-0.578744	-0.494154
					HUM	-0.258848	-0.620895
					UNN	0.510003	-0.615721
					UNC	0.374553	-0.645805
					UNT	0.622006	-0.433365
					BEC	0.0427385	-0.125774
					BED	-0.122703	0.0979274
persona00					persona07
	D1	D2				D1	D2
SDT	0.630009	-0.193585			SDT	0.590437	-0.213161
SDA	0.660296	-0.023676			SDA	0.656882	0.0293832
ST	0.512034	0.511006			ST	0.573871	0.478766
HE	0.373383	0.618229			HE	0.418945	0.647479
AC	-0.0551777	0.63437			AC	0.168347	0.604251
POD	-0.616453	0.360929			POD	-0.593466	0.439942
POR	0.123092	0.618119			POR	0.00567563	0.598871
FAC	-0.379601	0.581129			FAC	-0.239878	0.659149
SEP	-0.426686	-0.280744			SEP	-0.318075	-0.146738
SES	-0.692441	0.0471742			SES	-0.585445	0.137914
TR	-0.678547	0.252577			TR	-0.712524	0.0256575
COR	0.10579	-0.451009			COR	-0.316119	-0.466293
COI	-0.753411	0.134807			COI	-0.795205	-0.124468
HUM	-0.0964251	-0.655867			HUM	0.0326252	-0.612844
UNN	0.0287882	-0.813865			UNN	0.0272922	-0.812669
UNC	-0.260425	-0.708752			UNC	-0.329344	-0.686132
UNT	0.267542	-0.73039			UNT	0.114985	-0.76962
BEC	0.659285	-0.0532309			BEC	0.685836	-0.0200373
BED	0.598947	0.152779			BED	0.615161	0.230549
names00					names07
	D1	D2				D1	D2
SDT	0.639863	-0.12277			SDT	0.607323	0.0264085
SDA	0.370902	-0.195697			SDA	0.398702	-0.136634
ST	0.708671	-0.144829			ST	0.720854	-0.0890007
HE	0.632002	0.283825			HE	0.630099	0.270031
AC	-0.115911	0.730661			AC	-0.0515718	0.752173
POD	-0.441586	0.670187			POD	-0.321784	0.72238
POR	-0.247191	0.752536			POR	-0.146994	0.709463
FAC	-0.591244	0.614774			FAC	-0.58353	0.592863
SEP	-0.334712	-0.445882			SEP	-0.381869	-0.395898
SES	-0.640379	0.384764			SES	-0.640544	0.370294
TR	-0.72463	0.328583			TR	-0.740603	0.265507
COR	-0.423681	-0.0826877			COR	-0.557642	-0.120027
COI	-0.683751	-0.36351			COI	-0.661636	-0.43318
HUM	-0.0324024	-0.681573			HUM	-0.00549546	-0.716656
UNN	0.586137	-0.578528			UNN	0.604511	-0.545883
UNC	0.400532	-0.615509			UNC	0.364136	-0.65562
UNT	0.504016	-0.558966			UNT	0.511016	-0.583667
BEC	0.327792	-0.127654			BEC	0.271605	-0.151838
BED	0.0655745	0.152275			BED	-0.0165765	0.119284
