# Supplementary material
Source: ML conference proceedings conference paper supplement (https://openreview.net/forum?id=8zxGruuzr9)
Supplement: supplementary_material [file llama_8_all_coordinates_batch.xlsx]

## Sheet: All datasets
ValueAnchor00						ValueAnchor07
	D1	D2					D1	D2
SDT	0.691137	0.0785359				SDT	0.671469	0.0117561
SDA	0.676604	-0.138099				SDA	0.666457	-0.189481
ST	0.56417	0.464849				ST	0.568038	0.460286
HE	0.412991	0.631515				HE	0.347147	0.653088
AC	-0.0873403	0.733107				AC	-0.197304	0.718161
POD	-0.1697	0.70398				POD	-0.139133	0.732782
POR	-0.275303	0.688721				POR	-0.309413	0.696646
FAC	-0.488976	0.528359				FAC	-0.515624	0.496518
SEP	-0.236892	-0.565684				SEP	-0.240204	-0.479621
SES	-0.723698	0.0304641				SES	-0.61284	0.0707418
TR	-0.57897	0.33303				TR	-0.586637	0.27416
COR	-0.535275	-0.319182				COR	-0.606264	-0.271168
COI	-0.697595	-0.102412				COI	-0.677159	-0.0711421
HUM	-0.417563	-0.518094				HUM	-0.418314	-0.53979
UNN	0.487158	-0.443302				UNN	0.504047	-0.494919
UNC	0.326913	-0.474554				UNC	0.370365	-0.594531
UNT	0.392077	-0.458203				UNT	0.338684	-0.587188
BEC	0.396465	-0.568616				BEC	0.486173	-0.429357
BED	0.263798	-0.604415				BED	0.350514	-0.456942
demographic00						demographic07
	D1	D2					D1	D2
SDT	0.55691	-0.344797				SDT	0.570471	-0.34706
SDA	0.465097	-0.463265				SDA	0.539676	-0.44076
ST	0.437024	0.557417				ST	0.364103	0.568111
HE	0.145275	0.738861				HE	0.0346202	0.7699
AC	-0.486644	0.580865				AC	-0.408968	0.495077
POD	-0.242862	0.609678				POD	-0.291448	0.685085
POR	-0.511586	0.541176				POR	-0.438482	0.491749
FAC	-0.58084	0.48119				FAC	-0.469718	0.491239
SEP	0.356239	-0.529147				SEP	0.225153	-0.612106
SES	-0.600786	0.167542				SES	-0.637006	-0.238245
TR	-0.552278	0.5293				TR	-0.477429	0.448428
COR	0.056048	-0.559905				COR	-0.299454	-0.499297
COI	-0.683523	-0.179163				COI	-0.709657	0.285751
HUM	-0.702786	0.173889				HUM	-0.693846	0.0436179
UNN	0.459924	-0.467076				UNN	0.54092	-0.438829
UNC	0.52123	-0.406679				UNC	0.572661	-0.374573
UNT	0.461075	-0.468214				UNT	0.525098	-0.442973
BEC	0.445081	-0.493329				BEC	0.548257	-0.424956
BED	0.457401	-0.468341				BED	0.505049	-0.46016
persona00						persona07
	D1	D2					D1	D2
SDT	0.602207	-0.284394				SDT	0.618822	-0.255759
SDA	0.57316	-0.319458				SDA	0.596556	-0.280322
ST	0.61722	0.38471				ST	0.624884	0.263094
HE	0.325088	0.64723				HE	0.378903	0.61521
AC	-0.465782	-0.478363				AC	-0.590628	-0.328742
POD	-0.410021	0.611349				POD	-0.473171	0.578145
POR	-0.627762	0.408077				POR	-0.599315	0.359303
FAC	-0.618638	0.401974				FAC	-0.606246	0.348159
SEP	0.286731	-0.526711				SEP	0.323464	-0.561956
SES	-0.658483	0.120368				SES	-0.686472	0.178612
TR	-0.622518	0.374328				TR	-0.602321	0.355745
COR	-0.568064	-0.272721				COR	-0.627434	-0.207311
COI	-0.635533	0.384442				COI	-0.59396	0.383292
HUM	-0.721166	0.0336428				HUM	-0.73644	0.0672951
UNN	0.581843	-0.315935				UNN	0.591211	-0.295851
UNC	0.578855	-0.290354				UNC	0.601505	-0.303519
UNT	0.59426	-0.304434				UNT	0.591737	-0.310626
BEC	0.584465	-0.266399				BEC	0.603021	-0.292097
BED	0.584137	-0.307353				BED	0.585885	-0.312673
names00						names07
	D1	D2					D1	D2
SDT	0.543989	-0.3315				SDT	0.621452	-0.429614
SDA	0.49002	-0.546574				SDA	0.602259	-0.465849
ST	-0.237421	0.596026				ST	0.282817	0.242409
HE	-0.364885	0.630865				HE	-0.330708	0.675936
AC	-0.43326	0.586531				AC	-0.494275	0.468808
POD	0.188102	0.584032				POD	-0.17129	0.577955
POR	-0.452525	0.568235				POR	-0.526845	0.507776
FAC	-0.493919	0.555922				FAC	-0.529191	0.472291
SEP	0.298877	-0.611235				SEP	0.287605	-0.511718
SES	-0.383179	0.505004				SES	-0.326354	-0.057058
TR	-0.474259	0.554463				TR	-0.511174	0.492637
COR	-0.0113965	-0.573886				COR	-0.481985	-0.214259
COI	-0.504427	-0.0666686				COI	-0.717707	0.328732
HUM	-0.601237	0.281119				HUM	-0.683973	0.228117
UNN	0.479955	-0.552957				UNN	0.59864	-0.467282
UNC	0.511083	-0.5213				UNC	0.595311	-0.460918
UNT	0.494363	-0.542105				UNT	0.597709	-0.434982
BEC	0.477415	-0.560034				BEC	0.596899	-0.473943
BED	0.472707	-0.555937				BED	0.590808	-0.479037
