# Supplementary material
Source: ML conference proceedings conference paper supplement (https://openreview.net/forum?id=8zxGruuzr9)
Supplement: supplementary_material [file llama_8_all_coordinates_serial.xlsx]

## Sheet: All datasets
ValueAnchor00				ValueAnchor07
	D1	D2			D1	D2
SDT	0.752598	0.026631		SDT	0.752598	0.026631
SDA	0.755932	0.0248768		SDA	0.755932	0.0248768
ST	0.636836	0.424817		ST	0.636836	0.424817
HE	0.53954	0.546412		HE	0.53954	0.546412
AC	0.0328228	0.782486		AC	0.0328228	0.782486
POD	-0.204537	0.740443		POD	-0.204537	0.740443
POR	-0.0732819	0.780732		POR	-0.0732819	0.780732
FAC	-0.636981	0.300557		FAC	-0.636981	0.300557
SEP	-0.612022	-0.22478		SEP	-0.612022	-0.22478
SES	-0.518567	0.421564		SES	-0.518567	0.421564
TR	-0.463028	-0.013559		TR	-0.463028	-0.013559
COR	-0.444036	-0.42847		COR	-0.444036	-0.42847
COI	-0.523725	-0.376597		COI	-0.523725	-0.376597
HUM	-0.189465	-0.586813		HUM	-0.189465	-0.586813
UNN	0.445686	-0.473856		UNN	0.445686	-0.473856
UNC	0.345239	-0.531231		UNC	0.345239	-0.531231
UNT	0.619385	-0.328908		UNT	0.619385	-0.328908
BEC	-0.105728	-0.585742		BEC	-0.105728	-0.585742
BED	-0.35667	-0.498563		BED	-0.35667	-0.498563
demographic00				demographic07
	D1	D2			D1	D2
SDT	0.535925	0.0898243		SDT	0.41249	0.00212666
SDA	0.405169	0.224041		SDA	0.292735	0.157353
ST	0.905163	0.0861301		ST	0.871723	0.0840217
HE	0.873492	0.302958		HE	0.862897	0.243018
AC	0.0672425	0.76084		AC	-0.130954	0.812261
POD	0.076436	0.362262		POD	0.249864	0.361192
POR	0.201127	0.629048		POR	0.263398	0.611739
FAC	-0.306386	-0.871626		FAC	-0.468005	-0.795583
SEP	-0.570559	0.274609		SEP	-0.64532	0.246024
SES	-0.425834	0.466875		SES	-0.419225	0.393766
TR	-0.404023	0.34606		TR	-0.399259	0.51999
COR	-0.492174	-0.0214447		COR	-0.482615	-0.0891698
COI	-0.553611	-0.571528		COI	-0.618367	-0.503702
HUM	-0.135581	-0.187467		HUM	-0.0485625	-0.153072
UNN	0.380739	-0.688582		UNN	0.503604	-0.646666
UNC	-0.0054394	-0.700318		UNC	0.128896	-0.767
UNT	0.627192	-0.566894		UNT	0.627291	-0.565399
BEC	-0.551357	0.0828533		BEC	-0.400078	0.0709029
BED	-0.627522	-0.0176435		BED	-0.600514	0.0181979
persona00				persona07
	D1	D2			D1	D2
SDT	0.441794	0.463224		SDT	0.441794	0.463224
SDA	0.464441	0.478963		SDA	0.464441	0.478963
ST	0.776043	0.383622		ST	0.776043	0.383622
HE	0.815693	0.327032		HE	0.815693	0.327032
AC	-0.580602	-0.0227403		AC	-0.580602	-0.0227403
POD	0.464441	0.478963		POD	0.464441	0.478963
POR	0.249436	0.586924		POR	0.249436	0.586924
FAC	-0.794757	-0.191597		FAC	-0.794757	-0.191597
SEP	-0.65699	-0.308051		SEP	-0.65699	-0.308051
SES	-0.649284	0.153799		SES	-0.649284	0.153799
TR	0.0446577	0.486926		TR	0.0446577	0.486926
COR	-0.540704	-0.413642		COR	-0.540704	-0.413642
COI	-0.354751	-0.730528		COI	-0.354751	-0.730528
HUM	0.0144218	-0.639946		HUM	0.0144218	-0.639946
UNN	0.509696	0.220132		UNN	0.509696	0.220132
UNC	0.126477	-0.140254		UNC	0.126477	-0.140254
UNT	0.652851	-0.0533788		UNT	0.652851	-0.0533788
BEC	-0.449102	-0.55181		BEC	-0.449102	-0.55181
BED	-0.53376	-0.527637		BED	-0.53376	-0.527637
names00				names07
	D1	D2			D1	D2
SDT	-0.583328	-0.52702		SDT	0.701195	-0.121772
SDA	0.336142	0.470946		SDA	0.380278	0.397724
ST	0.209416	0.719175		ST	0.406182	0.622341
HE	0.0643988	0.730462		HE	0.335415	0.690804
AC	0.137436	0.436617		AC	0.0713593	0.425665
POD	-0.0978505	0.656262		POD	-0.0112873	0.701775
POR	-0.170474	0.654956		POR	-0.071647	0.713699
FAC	-0.829486	-0.119277		FAC	-0.801974	0.109696
SEP	0.437245	-0.278919		SEP	0.132785	-0.374038
SES	-0.251561	-0.532672		SES	-0.424523	-0.338157
TR	-0.134374	0.414676		TR	-0.224823	0.464861
COR	-0.265846	-0.710278		COR	-0.395015	-0.627007
COI	-0.70765	0.26103		COI	-0.713453	0.318879
HUM	-0.702447	-0.459654		HUM	-0.741879	-0.335938
UNN	0.524204	-0.564686		UNN	0.318355	-0.698728
UNC	0.625193	-0.408268		UNC	0.374303	-0.626195
UNT	0.664461	-0.165774		UNT	0.436393	-0.521678
BEC	0.274967	-0.573141		BEC	-0.0219794	-0.64652
BED	0.469552	-0.0044352		BED	0.250317	-0.15541
