# Supplementary material
Source: ML conference proceedings conference paper supplement (https://openreview.net/forum?id=8zxGruuzr9)
Supplement: supplementary_material [file llama_70_all_coordinates_batch.xlsx]

## Sheet: All datasets
	ValueAnchor00			ValueAnchor07
	D1	D2		D1	D2
SDT	0.673426	-0.0414061	SDT	0.683733	-0.0764672
SDA	0.681994	0.0234177	SDA	0.678098	0.00120486
ST	0.532774	0.483161	ST	0.565875	0.457243
HE	0.425227	0.587748	HE	0.435258	0.571617
AC	0.0655045	0.741094	AC	0.0989901	0.735314
POD	-0.238661	0.66988	POD	-0.289614	0.676927
POR	-0.166955	0.70821	POR	-0.18712	0.703777
FAC	-0.336268	0.628734	FAC	-0.360115	0.616933
SEP	-0.632888	-0.202975	SEP	-0.661407	-0.137453
SES	-0.686604	0.0352975	SES	-0.666802	0.0270638
TR	-0.635655	0.291208	TR	-0.627853	0.307095
COR	-0.640415	-0.207424	COR	-0.62236	-0.259285
COI	-0.489625	-0.450147	COI	-0.527638	-0.444961
HUM	-0.223289	-0.64621	HUM	-0.216088	-0.624841
UNN	0.551244	-0.441747	UNN	0.552607	-0.404831
UNC	0.357887	-0.573141	UNC	0.387861	-0.548777
UNT	0.48112	-0.494411	UNT	0.469875	-0.467366
BEC	0.0815613	-0.611778	BEC	0.103431	-0.632318
BED	0.199623	-0.499511	BED	0.18327	-0.500875
	demographic00			demographic07
	D1	D2		D1	D2
SDT	0.654431	0.0704855	SDT	0.681657	-0.104723
SDA	0.543357	-0.494545	SDA	0.576489	-0.359136
ST	0.43444	0.584432	ST	0.397305	0.623762
HE	0.381526	0.598086	HE	0.458114	0.597685
AC	-0.0973598	0.739183	AC	-0.123734	0.748451
POD	-0.495814	0.532036	POD	-0.448467	0.58784
POR	-0.351906	0.61975	POR	-0.346567	0.648821
FAC	-0.168508	0.680171	FAC	-0.271222	0.625346
SEP	-0.247599	-0.586791	SEP	-0.195028	-0.531065
SES	-0.674706	0.00348609	SES	-0.677768	-0.0144069
TR	-0.605527	0.345907	TR	-0.590008	0.382428
COR	-0.665937	-0.0505228	COR	-0.687723	0.0579786
COI	-0.48239	-0.459242	COI	-0.539311	-0.335608
HUM	-0.421194	-0.187677	HUM	-0.380841	-0.480628
UNN	0.61194	-0.405323	UNN	0.55954	-0.439089
UNC	0.384146	-0.334744	UNC	0.356835	-0.616867
UNT	0.649953	-0.355727	UNT	0.504211	-0.445531
BEC	0.334135	-0.650437	BEC	0.39586	-0.494677
BED	0.217014	-0.648528	BED	0.330657	-0.450583
	persona00			persona07
	D1	D2		D1	D2
SDT	0.630867	-0.233515	SDT	0.672811	-0.213186
SDA	0.665698	-0.201689	SDA	0.683962	-0.199524
ST	0.697872	-0.0916983	ST	0.693357	-0.158022
HE	0.659697	0.242562	HE	0.695735	0.119043
AC	-0.303382	0.649524	AC	-0.379095	0.574266
POD	-0.639799	0.28748	POD	-0.626942	0.33222
POR	-0.601071	0.361237	POR	-0.612509	0.318416
FAC	-0.549848	0.41607	FAC	-0.565846	0.374218
SEP	-0.615737	-0.203429	SEP	-0.604097	-0.0315293
SES	-0.616352	0.339399	SES	-0.637193	0.278542
TR	-0.617733	0.316417	TR	-0.626977	0.297648
COR	-0.655469	0.270522	COR	-0.652166	0.260486
COI	-0.676106	0.040893	COI	-0.699691	0.0462342
HUM	-0.299503	-0.54267	HUM	-0.376806	-0.430458
UNN	0.632675	-0.293489	UNN	0.666928	-0.254331
UNC	0.450594	-0.482099	UNC	0.489525	-0.439328
UNT	0.664702	-0.200835	UNT	0.676483	-0.221622
BEC	0.52072	-0.420239	BEC	0.539763	-0.42363
BED	0.652175	-0.254439	BED	0.66276	-0.22944
	names00			names07
	D1	D2		D1	D2
SDT	0.635598	-0.445825	SDT	0.604093	-0.420551
SDA	0.56968	-0.511527	SDA	0.594164	-0.448803
ST	0.374413	0.413146	ST	0.294517	0.482252
HE	0.0329373	0.635423	HE	-0.0551051	0.72172
AC	-0.416615	0.519863	AC	-0.352994	0.582008
POD	-0.434202	0.573975	POD	-0.533954	0.487248
POR	-0.49317	0.481642	POR	-0.478968	0.511832
FAC	-0.481202	0.513499	FAC	-0.468518	0.527719
SEP	-0.205306	-0.447078	SEP	-0.0677531	-0.56389
SES	-0.541228	-0.236103	SES	-0.539916	-0.273518
TR	-0.530535	0.429538	TR	-0.507813	0.464786
COR	-0.7052	0.180583	COR	-0.690643	0.0776635
COI	-0.649661	0.31124	COI	-0.634205	0.365588
HUM	-0.0451046	0.141583	HUM	-0.0693521	-0.1291
UNN	0.599852	-0.476828	UNN	0.57219	-0.466023
UNC	0.618896	-0.488805	UNC	0.591704	-0.47648
UNT	0.569923	-0.502862	UNT	0.599177	-0.445224
BEC	0.565419	-0.539955	BEC	0.582588	-0.495623
BED	0.535507	-0.551509	BED	0.560786	-0.501605
