# Supplementary material
Source: ML conference proceedings conference paper supplement (https://openreview.net/forum?id=8zxGruuzr9)
Supplement: supplementary_material [file llama_70_all_coordinates_serial.xlsx]

## Sheet: All datasets
ValueAnchor00				ValueAnchor07
	D1	D2			D1	D2
SDT	0.717036	0.24531		SDT	0.717036	0.24531
SDA	0.617054	0.415135		SDA	0.617054	0.415135
ST	0.658225	0.401816		ST	0.658225	0.401816
HE	0.557331	0.500048		HE	0.557331	0.500048
AC	0.127463	0.753481		AC	0.127463	0.753481
POD	-0.162289	0.74808		POD	-0.162289	0.74808
POR	-0.0238279	0.763697		POR	-0.0238279	0.763697
FAC	-0.227307	0.729551		FAC	-0.227307	0.729551
SEP	-0.620597	-0.166567		SEP	-0.620597	-0.166567
SES	-0.637061	0.0527312		SES	-0.637061	0.0527312
TR	-0.633659	-0.2143		TR	-0.633659	-0.2143
COR	-0.49098	-0.375988		COR	-0.49098	-0.375988
COI	-0.453543	-0.46512		COI	-0.453543	-0.46512
HUM	-0.0778922	-0.608357		HUM	-0.0778922	-0.608357
UNN	0.397417	-0.523985		UNN	0.397417	-0.523985
UNC	0.152389	-0.622653		UNC	0.152389	-0.622653
UNT	0.30906	-0.596331		UNT	0.30906	-0.596331
BEC	0.00579127	-0.606925		BEC	0.00579127	-0.606925
BED	-0.214612	-0.429623		BED	-0.214612	-0.429623
demographic00				demographic07
	D1	D2			D1	D2
SDT	0.669407	-0.0124539		SDT	0.676858	-0.0351091
SDA	0.667303	0.162582		SDA	0.673771	0.163126
ST	0.621845	0.49741		ST	0.613842	0.489525
HE	0.314149	0.744297		HE	0.333364	0.739796
AC	0.443127	0.55783		AC	0.450122	0.531428
POD	-0.233275	0.628416		POD	-0.178979	0.656963
POR	0.0956944	0.733791		POR	0.119971	0.720245
FAC	-0.165949	0.76531		FAC	-0.173227	0.759035
SEP	-0.482677	-0.465765		SEP	-0.485945	-0.44668
SES	-0.456158	-0.29632		SES	-0.490709	-0.304811
TR	-0.672338	-0.247144		TR	-0.684748	-0.273799
COR	-0.602978	-0.406023		COR	-0.584891	-0.432268
COI	-0.736813	0.050752		COI	-0.72576	0.0473047
HUM	-0.149055	-0.616152		HUM	-0.143836	-0.623514
UNN	0.594718	-0.374489		UNN	0.59624	-0.395443
UNC	0.219116	-0.584429		UNC	0.226979	-0.57259
UNT	0.478065	-0.547807		UNT	0.428312	-0.555412
BEC	-0.217133	-0.468327		BEC	-0.214292	-0.435375
BED	-0.387049	-0.121478		BED	-0.437072	-0.0324225
persona00				persona07
	D1	D2			D1	D2
SDT	0.648013	0.0994374		SDT	0.648013	0.0994374
SDA	0.664839	-0.00314497		SDA	0.664839	-0.00314497
ST	0.574137	0.342644		ST	0.574137	0.342644
HE	0.397638	0.515428		HE	0.397638	0.515428
AC	-0.0906565	0.642526		AC	-0.0906565	0.642526
POD	-0.247307	0.42649		POD	-0.247307	0.42649
POR	-0.516989	0.589496		POR	-0.516989	0.589496
FAC	-0.276041	0.699257		FAC	-0.276041	0.699257
SEP	-0.457713	-0.492114		SEP	-0.457713	-0.492114
SES	-0.449025	0.423582		SES	-0.449025	0.423582
TR	-0.708011	0.280342		TR	-0.708011	0.280342
COR	-0.72756	0.116119		COR	-0.72756	0.116119
COI	-0.526915	-0.212833		COI	-0.526915	-0.212833
HUM	-0.0455293	-0.783442		HUM	-0.0455293	-0.783442
UNN	0.379036	-0.749606		UNN	0.379036	-0.749606
UNC	0.267511	-0.75553		UNC	0.267511	-0.75553
UNT	0.623693	-0.413102		UNT	0.623693	-0.413102
BEC	0.33715	-0.499479		BEC	0.33715	-0.499479
BED	0.153729	-0.226071		BED	0.153729	-0.226071
names00				names07
	D1	D2			D1	D2
SDT	0.568097	-0.171345		SDT	0.33545	-0.533756
SDA	0.545927	-0.337655		SDA	0.423625	-0.466912
ST	0.196553	0.395758		ST	0.161513	0.375348
HE	-0.235659	0.744927		HE	-0.275002	0.715861
AC	-0.0986095	0.108718		AC	-0.41792	-0.220857
POD	-0.568033	0.66603		POD	-0.511614	0.666883
POR	-0.586567	0.615222		POR	-0.553941	0.638503
FAC	-0.502925	0.648972		FAC	-0.532378	0.606106
SEP	0.192172	-0.491762		SEP	0.172778	-0.492383
SES	0.00381635	-0.311522		SES	0.0243696	-0.600809
TR	-0.668753	0.514711		TR	-0.604042	0.591478
COR	-0.762653	0.225704		COR	-0.674443	0.385487
COI	-0.682902	0.446409		COI	-0.61871	0.547993
HUM	0.197066	-0.704017		HUM	0.686609	-0.15182
UNN	0.46336	-0.525134		UNN	0.507306	-0.380993
UNC	0.475645	-0.489143		UNC	0.497708	-0.41215
UNT	0.47011	-0.477944		UNT	0.484572	-0.397488
BEC	0.485958	-0.451027		BEC	0.457094	-0.426386
BED	0.507397	-0.406902		BED	0.437025	-0.444102
